# Supplementary material for: Targeted Metabolic Profiling of Methionine Cycle Metabolites and Redox Thiol Pools in Mammalian Plasma, Cells and Urine
Source: PubMed Central journal article supplement (PMC6836102; doi:10.3390/metabo9100235), 2019-10-18
Supplement: metabolites-09-00235-s001.pdf [file metabolites-09-00235-s001.pdf]

## Supplemental Material for

### Targeted metabolic profiling of methionine cycle metabolites and redox thiol pools in mammalian plasma, cells and urine.

Sidney Behringer<sup>1</sup>, Victoria Wingert<sup>1</sup>, Victor Oria<sup>2,3</sup>, Anke Schumann<sup>1,4</sup>, Sarah Grünert<sup>4</sup>, Artur Cieslar-Pobuda<sup>5</sup>, Stefan Kölker<sup>6</sup>, Ann-Kathrin Lederer<sup>7</sup>, Donald W. Jacobsen<sup>8</sup>, Judith Staerk<sup>5,9</sup>, Oliver Schilling<sup>2</sup>, Ute Spiekerkoetter<sup>4</sup> and Luciana Hannibal<sup>1\*</sup>

<sup>1</sup>Laboratory of Clinical Biochemistry and Metabolism, Department of General Pediatrics, Adolescent Medicine and Neonatology, Medical Center, University of Freiburg, Freiburg, Germany.

<sup>2</sup>Institute of Surgical Pathology, Medical Center - University of Freiburg, Freiburg, Germany.

<sup>3</sup>Spemann Graduate School of Biology and Medicine, Faculty of Biology, University of Freiburg, Freiburg, Germany.

<sup>4</sup>Department of General Pediatrics, Adolescent Medicine and Neonatology, Medical Center, University of Freiburg, Freiburg, Germany.

<sup>5</sup>Nordic European Molecular Laboratory (EMBL) Partnership, Centre for Molecular Medicine Norway, University of Oslo and Oslo University Hospital, Oslo, Norway.

<sup>6</sup>Centre for Child and Adolescent Medicine, Department of General Pediatrics, Division of Neuropediatrics and Metabolic Medicine, University Hospital Heidelberg, Heidelberg, Germany.

<sup>7</sup>Center for Complementary Medicine, Institute for Infection Prevention and Hospital Epidemiology, Medical Center – University of Freiburg, Faculty of Medicine, University of Freiburg, Freiburg, Germany.

<sup>8</sup>Department of Cardiovascular and Metabolic Sciences, Lerner Research Institute, Cleveland Clinic, Cleveland, USA.

<sup>9</sup>Norwegian Center for Stem Cell Research, Department of Immunology, Oslo University Hospital, 0372 Oslo, Norway

\*Correspondence: [luciana.hannibal@uniklinik-freiburg.de](mailto:luciana.hannibal@uniklinik-freiburg.de); Tel.: +49-761-270-43710

## Figures

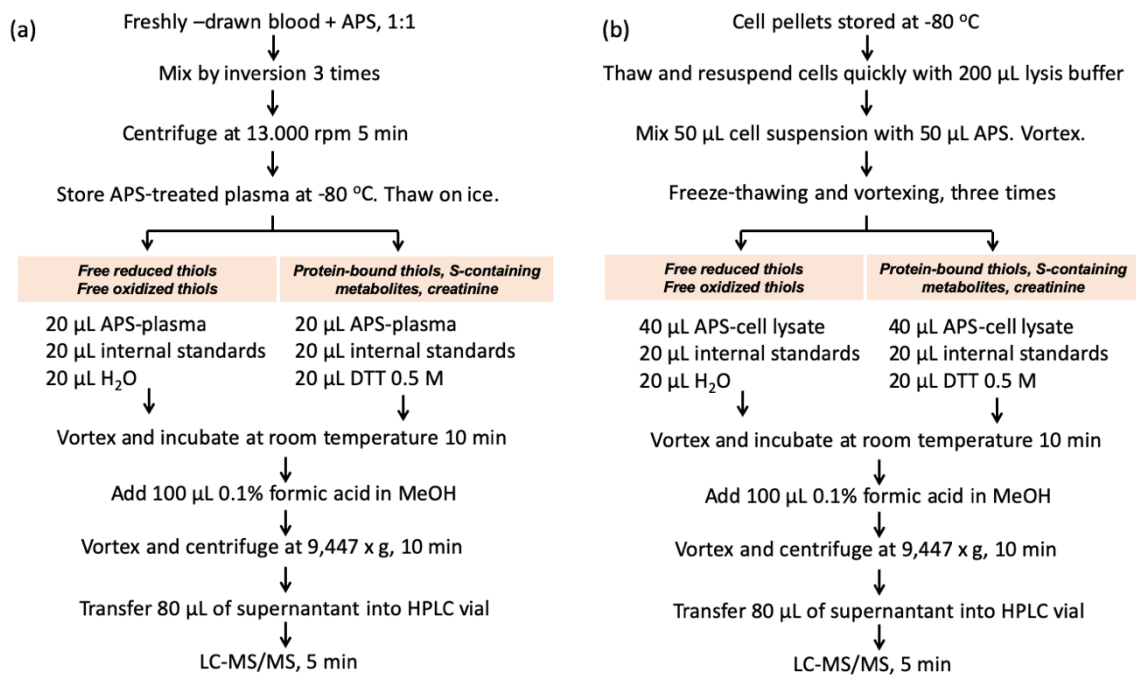

**Figure S1.** Sample preparation workflows. Panel A. Sample preparation for APS-plasma, required for the profiling of oxidized and reduced thiol species in plasma. Panel B. Sample preparation with APS for cell lysates, required for the profiling of intracellular reduced and oxidized thiol species.

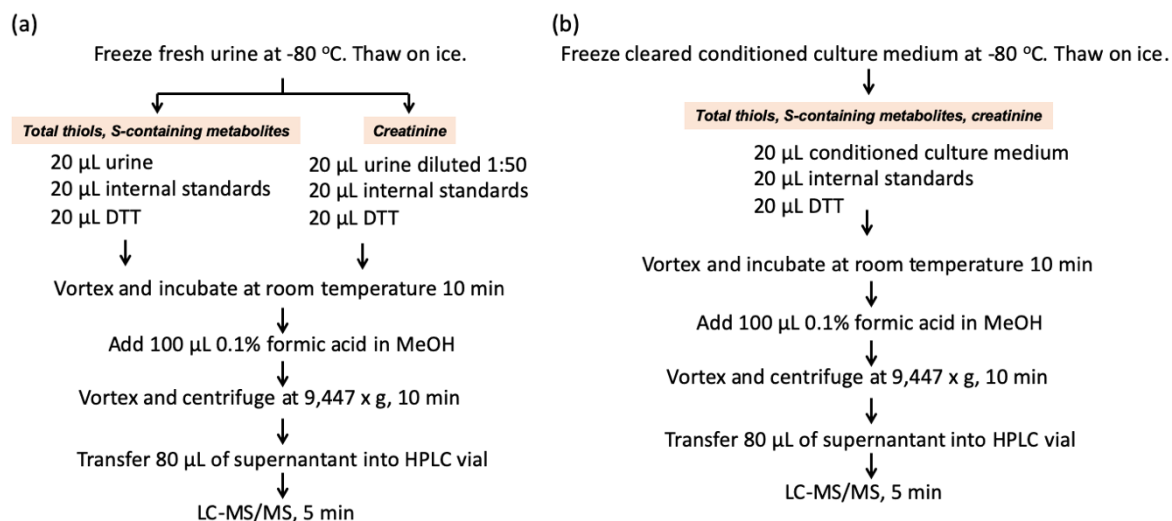

**Figure S2.** Sample preparation workflows. Panel A. Sample preparation for urine. This method quantifies total thiol and thioether metabolites and creatinine. Panel B. Sample preparation for conditioned culture medium. This method quantifies total thiol and thioether metabolites and creatinine.

(a)

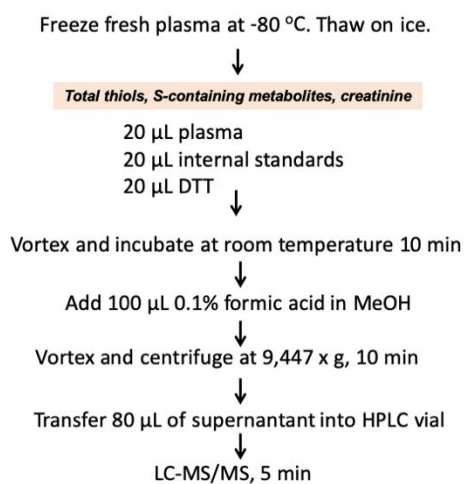

**Figure S3.** Sample preparation workflows. Panel A. Sample preparation for untreated plasma, the starting specimen typically used in clinical diagnostic laboratories. This method quantifies total thiol and thioether metabolites and creatinine.

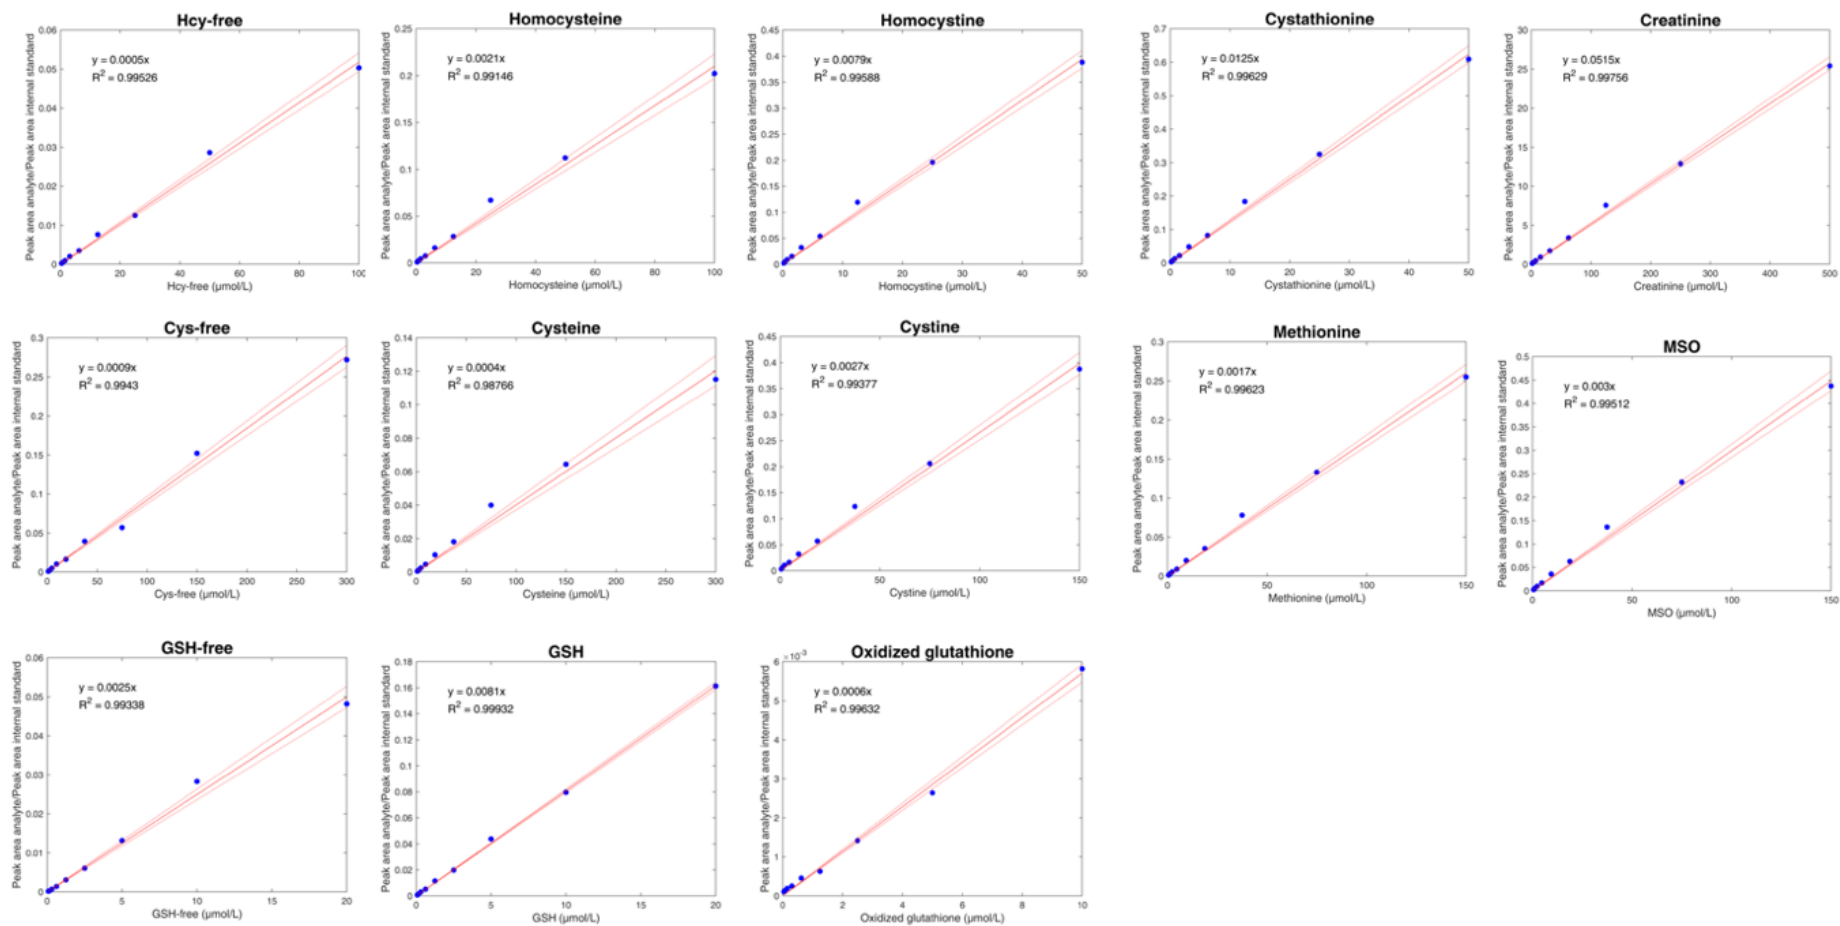

**Figure S4.** Calibration curves of the metabolites examined in this study. A linear fit forced to intercept at  $x = 0, y = 0$  was applied in all cases. All curves consist of 9–12 calibration points, using pure commercially available substances.

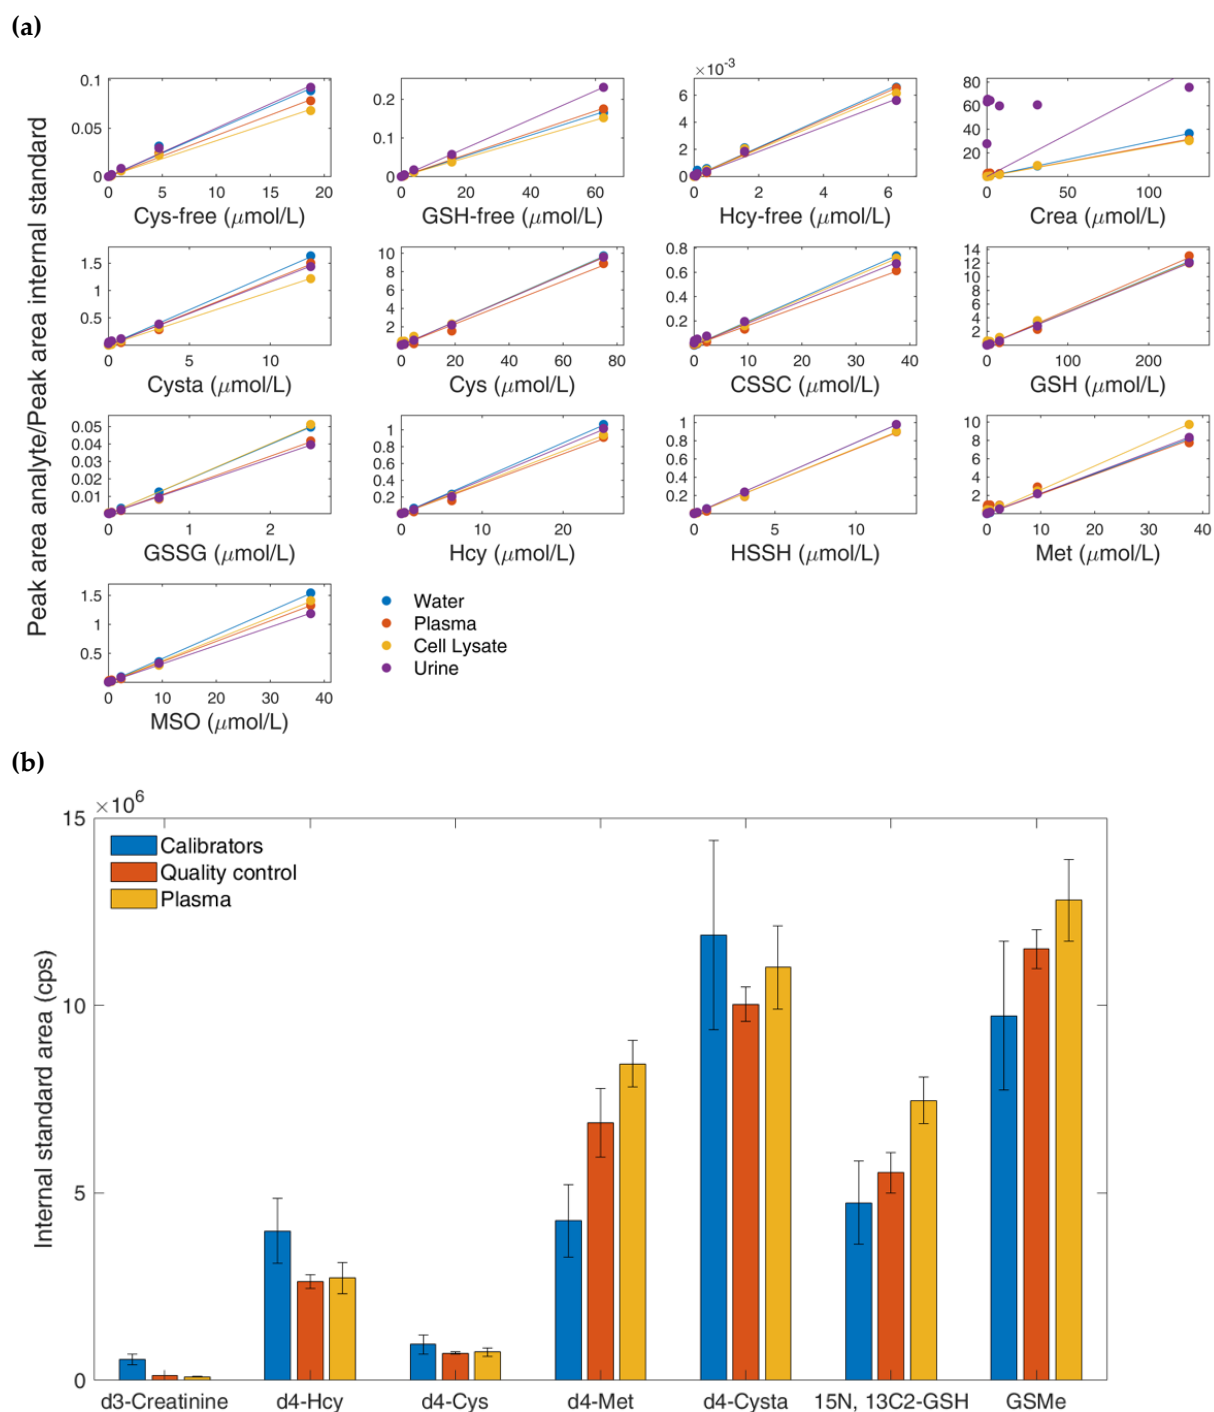

**Figure S5.** Effect of sample matrix on the quantification of thiol and thioether metabolites with diagnostic value. Panel (a). Calibration curves made in water or in extracted plasma, cell lysate and urine as solvent. With the exception of the calibration curve of creatinine made in urine as the biological matrix, all other metabolites exhibited linear trends that did not deviate markedly from that of the curve made with water as the solvent. Slopes and goodness of fit ( $R^2$ ) for all metabolites are provided in Table S4. Panel (b). Peak area of isotopically labelled internal standards D3-creatinine, D4-homocysteine, D4-cysteine, d4-methionine, D4-cystathionine and  $^{15}\text{N}$ ,  $^{13}\text{C}_2$ -glutathione compared to GSMe in calibrators (blue), quality control (lyophilized serum, orange) and human plasma (yellow).

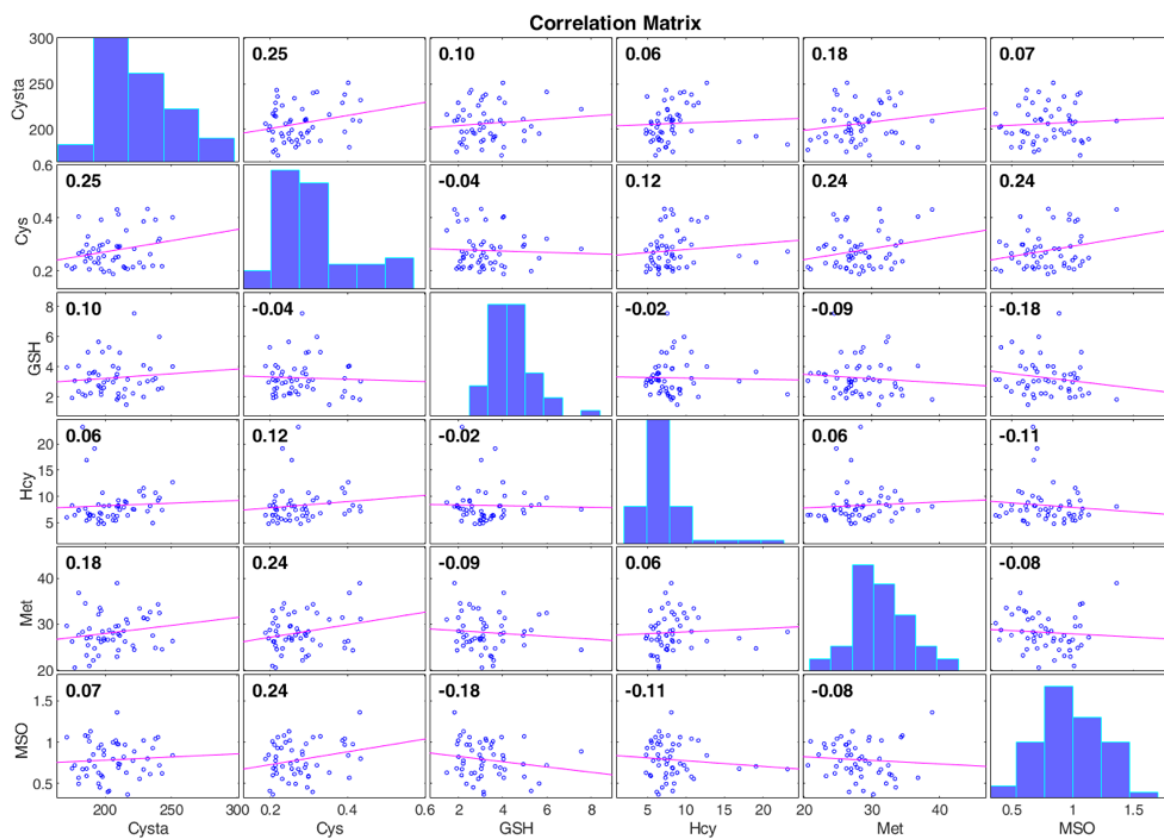

**Figure S6.** Pearson's correlation among thiol and thioether metabolites examined in this study. Pearson's coefficients are given in the upper left corner of each graph. No correlations were observed at a significant level of 0.05.

Tables

**Table S1.** Stability of thiol and thioether metabolites in human plasma.

| Sample    | Time (min) | Metabolite (μmol/L) |      |      |       |       |       |       |      |      |
|-----------|------------|---------------------|------|------|-------|-------|-------|-------|------|------|
|           |            | Cysta               | Cys  | CSSC | GSH   | GSSG  | Hcy   | HSSH  | Met  | MSO  |
| Subject 1 | 0          | 0.544               | 7.9  | 72.4 | 1.4   | 0.72  | 0.469 | 0.151 | 21.7 | 1.56 |
|           | 15         | 0.53                | 5.83 | 72.2 | 0.844 | 0.64  | 0.41  | 0.151 | 20.1 | 1.62 |
|           | 30         | 0.511               | 2.73 | 63   | 0.586 | 0.632 | 0.514 | 0.139 | 19.1 | 1.58 |
|           | 60         | 0.514               | 3.81 | 66.8 | 0.61  | 0.454 | 0.522 | 0.145 | 18.5 | 1.56 |
| Subject 2 | 0          | 0.398               | 8.95 | 64.5 | 1.66  | 0.487 | 0.522 | 0.185 | 25.4 | 1.57 |
|           | 15         | 0.398               | 5.46 | 62.5 | 1.08  | 0.447 | 0.581 | 0.183 | 25.3 | 1.59 |
|           | 30         | 0.402               | 3.37 | 67   | 0.893 | 0.458 | 0.592 | 0.175 | 27.8 | 1.6  |
|           | 60         | 0.394               | 2.34 | 54.4 | 0.673 | 0.865 | 0.592 | 0.145 | 26   | 1.6  |
| Subject 3 | 0          | 0.401               | 8.06 | 77.4 | 1.87  | 0.354 | 0.439 | 0.16  | 25.5 | 1.34 |
|           | 15         | 0.401               | 6.74 | 74.1 | 1.28  | 0.226 | 0.417 | 0.157 | 25.8 | 1.36 |
|           | 30         | 0.403               | 4.2  | 69.2 | 0.912 | 0.22  | 0.573 | 0.147 | 24   | 1.34 |
|           | 60         | 0.402               | 5.73 | 78.9 | 1.08  | 0.257 | 0.607 | 0.156 | 26.2 | 1.36 |
| Subject 4 | 0          | 0.555               | 11.3 | 72.6 | 1.93  | 0.259 | 0.521 | 0.167 | 30.7 | 1.61 |
|           | 15         | 0.562               | 8.53 | 72.6 | 1.09  | 0.253 | 0.452 | 0.164 | 29.3 | 1.61 |
|           | 30         | 0.553               | 6.02 | 70.7 | 0.741 | 0.185 | 0.692 | 0.157 | 29.3 | 1.62 |
|           | 60         | 0.56                | 4.6  | 68.5 | 0.68  | 0.168 | 0.633 | 0.147 | 30.2 | 1.63 |



**Table S2.** Slopes and goodness of linear fits ( $R^2$ ) from calibration curves made with different biological matrices.

| <b>Slopes (<math>y = ax</math>; where <math>a</math> is the slope from linear fits forced to intercept at 0,0)</b> |                 |                 |                 |             |              |            |             |            |             |            |             |            |            |
|--------------------------------------------------------------------------------------------------------------------|-----------------|-----------------|-----------------|-------------|--------------|------------|-------------|------------|-------------|------------|-------------|------------|------------|
| -                                                                                                                  | <b>Cys-free</b> | <b>GSH-free</b> | <b>Hcy-free</b> | <b>Crea</b> | <b>Cysta</b> | <b>Cys</b> | <b>CSSC</b> | <b>GSH</b> | <b>GSSG</b> | <b>Hcy</b> | <b>HSSH</b> | <b>Met</b> | <b>MSO</b> |
| <b>Water</b>                                                                                                       | 0.0049          | 0.0027          | 0.0011          | 0.2919      | 0.1294       | 0.1289     | 0.0196      | 0.0490     | 0.0199      | 0.0423     | 0.0780      | 0.2179     | 0.0410     |
| <b>Plasma</b>                                                                                                      | 0.0042          | 0.0028          | 0.0010          | 0.2536      | 0.1184       | 0.1159     | 0.0162      | 0.0512     | 0.0165      | 0.0357     | 0.0711      | 0.2138     | 0.0354     |
| <b>Cell Lysate</b>                                                                                                 | 0.0037          | 0.0024          | 0.0010          | 0.2466      | 0.0977       | 0.1281     | 0.0190      | 0.0486     | 0.0201      | 0.0374     | 0.0717      | 0.2605     | 0.0372     |
| <b>Urine</b>                                                                                                       | 0.0050          | 0.0037          | 0.0009          | 0.7189      | 0.1158       | 0.1271     | 0.0182      | 0.0479     | 0.0158      | 0.0402     | 0.0782      | 0.2225     | 0.0318     |
| <b>R<sup>2</sup></b>                                                                                               | -               | -               | -               | -           | -            | -          | -           | -          | -           | -          | -           | -          | -          |
| -                                                                                                                  | <b>Cys-free</b> | <b>GSH-free</b> | <b>Hcy-free</b> | <b>Crea</b> | <b>Cysta</b> | <b>Cys</b> | <b>CSSC</b> | <b>GSH</b> | <b>GSSG</b> | <b>Hcy</b> | <b>HSSH</b> | <b>Met</b> | <b>MSO</b> |
| <b>Water</b>                                                                                                       | 0.987           | 0.997           | 0.990           | 1.000       | 0.998        | 1.000      | 1.000       | 0.999      | 1.000       | 0.999      | 1.000       | 0.999      | 1.000      |
| <b>Plasma</b>                                                                                                      | 0.996           | 0.998           | 0.999           | 0.971       | 0.994        | 0.991      | 0.998       | 0.992      | 0.997       | 0.991      | 0.997       | 0.940      | 0.998      |
| <b>Cell Lysate</b>                                                                                                 | 0.993           | 1.000           | 0.992           | 0.996       | 1.000        | 0.994      | 0.998       | 0.991      | 0.992       | 0.999      | 0.998       | 0.995      | 0.998      |
| <b>Urine</b>                                                                                                       | 0.993           | 1.000           | 0.992           | 0.522       | 0.994        | 0.999      | 0.985       | 1.000      | 0.999       | 0.997      | 1.000       | 1.000      | 0.999      |

**Table S3.** Concentration of Hcy in quality control and commercial pooled human plasma determined with calibration curves prepared with various biological matrices.

| <b>Hcy (<math>\mu\text{mol/L}</math>)</b> | <b>Water</b> | <b>Plasma</b> | <b>Cell lysate</b> | <b>Urine</b> |
|-------------------------------------------|--------------|---------------|--------------------|--------------|
| QC1                                       | 46           | 54            | 51                 | 48           |
| QC2                                       | 48           | 56            | 54                 | 50           |
| QC3                                       | 45           | 54            | 51                 | 48           |
| Mean                                      | 46           | 55            | 52                 | 49           |
| Standard deviation                        | 1            | 2             | 1                  | 1            |
| Human plasma 1                            | 6.8          | 8.0           | 7.6                | 7.1          |
| Human plasma 2                            | 6.1          | 7.2           | 6.9                | 6.4          |
| Human plasma 3                            | 7.5          | 8.8           | 8.4                | 7.9          |
| Human plasma 4                            | 8.7          | 10.3          | 9.8                | 9.2          |
| Human plasma 5                            | 7.0          | 8.2           | 7.9                | 7.3          |
| Mean                                      | 7.2          | 8.5           | 8.1                | 7.6          |
| Standard deviation                        | 1.0          | 1.2           | 1.1                | 1.0          |

**Table S4.** Analysis of thiols and thioethers in untreated plasma as typically processed in diagnostic laboratories, in a cohort of healthy individuals (N= 53).

| Sample ID  | Metabolite ( $\mu\text{mol/L}$ ) |     |      |      |      |       |
|------------|----------------------------------|-----|------|------|------|-------|
|            | Cysta                            | Cys | GSH  | Hcy  | Met  | MSO   |
| Subject 1  | 0.393                            | 238 | 3.23 | 10.7 | 24.8 | 1.04  |
| Subject 2  | 0.299                            | 186 | 3.03 | 5.43 | 23.2 | 0.59  |
| Subject 3  | 0.188                            | 206 | 4.04 | 6.44 | 28.1 | 0.795 |
| Subject 4  | 0.251                            | 208 | 3.26 | 5.44 | 29.5 | 1.02  |
| Subject 5  | 0.402                            | 251 | 4.01 | 12.7 | 26.3 | 0.839 |
| Subject 6  | 0.414                            | 210 | 1.94 | 8.32 | 24.3 | 0.975 |
| Subject 7  | 0.196                            | 199 | 2.96 | 4.82 | 26.9 | 0.845 |
| Subject 8  | 0.214                            | 229 | 4.09 | 10.1 | 31.3 | 0.669 |
| Subject 9  | 0.219                            | 236 | 3.11 | 4.93 | 27.5 | 0.928 |
| Subject 10 | 0.283                            | 222 | 7.55 | 7.55 | 24.4 | 0.887 |
| Subject 11 | 0.387                            | 229 | 1.99 | 11.6 | 31.4 | 1.02  |
| Subject 12 | 0.393                            | 197 | 2.37 | 6.7  | 26.1 | 0.969 |
| Subject 13 | 0.24                             | 206 | 2.97 | 5.5  | 26.6 | 0.998 |
| Subject 14 | 0.206                            | 188 | 3.56 | 6.46 | 20.9 | 1.01  |
| Subject 15 | 0.231                            | 226 | 2.9  | 11   | 33.4 | 0.555 |
| Subject 16 | 0.299                            | 198 | 4.98 | 10.7 | 28.4 | 0.581 |
| Subject 17 | 0.229                            | 195 | 3.45 | 5.72 | 23.1 | 0.93  |
| Subject 18 | 0.311                            | 240 | 2.5  | 9.24 | 34.3 | 1.06  |
| Subject 19 | 0.29                             | 210 | 3.89 | 8.22 | 27.8 | 0.691 |
| Subject 20 | 0.293                            | 209 | 3.5  | 6.27 | 22.9 | 0.98  |
| Subject 21 | 0.31                             | 202 | 3.14 | 6.21 | 26.6 | 0.397 |
| Subject 22 | 0.199                            | 203 | 5.29 | 8.27 | 28.7 | 0.409 |
| Subject 23 | 0.256                            | 186 | 3.03 | 16.9 | 26.9 | 0.678 |
| Subject 24 | 0.296                            | 196 | 2.67 | 6.89 | 33.5 | 0.452 |
| Subject 25 | 0.321                            | 241 | 5.99 | 9.75 | 32.4 | 0.72  |
| Subject 26 | 0.207                            | 197 | 2.14 | 5.35 | 32.9 | 0.599 |
| Subject 27 | 0.22                             | 171 | 3.95 | 6.03 | 29.6 | 1.06  |
| Subject 28 | 0.217                            | 243 | 2.58 | 7.41 | 24.5 | 0.622 |
| Subject 29 | 0.293                            | 211 | 4.93 | 7.46 | 27.5 | 0.733 |
| Subject 30 | 0.214                            | 177 | 3.06 | 6.45 | 20.5 | 0.72  |
| Subject 31 | 0.434                            | 232 | 3.03 | 7.19 | 31.1 | 0.799 |
| Subject 32 | 0.214                            | 221 | 2.22 | 7.59 | 25.3 | 0.776 |
| Subject 33 | 0.284                            | 191 | 3.59 | 6.34 | 22.1 | 0.849 |
| Subject 34 | 0.405                            | 180 | 4.05 | 7.33 | 36.8 | 0.568 |
| Subject 35 | 1.71                             | 240 | 3.21 | 10.8 | 24.5 | 0.399 |
| Subject 36 | 0.207                            | 217 | 3.15 | 6.41 | 30.2 | 0.366 |
| Subject 37 | 0.263                            | 234 | 3.85 | 8.18 | 32.6 | 0.613 |
| Subject 38 | 0.211                            | 215 | 2.51 | 9.07 | 26.2 | 0.968 |
| Subject 39 | 0.232                            | 192 | 3.66 | 19.1 | 24.7 | 0.706 |
| Subject 40 | 0.236                            | 185 | 2.08 | 7.68 | 34.5 | 1.08  |
| Subject 41 | 0.432                            | 209 | 1.82 | 8.08 | 38.9 | 1.36  |
| Subject 42 | 0.208                            | 175 | 1.92 | 8.28 | 26.2 | 0.682 |
| Subject 43 | 0.248                            | 195 | 5.65 | 8.46 | 32.1 | 0.499 |
| Subject 44 | 0.249                            | 189 | 2.23 | 6.5  | 27.1 | 1.13  |
| Subject 45 | 0.266                            | 180 | 2.36 | 7.42 | 27.6 | 0.495 |

|            |       |     |      |      |      |       |
|------------|-------|-----|------|------|------|-------|
| Subject 46 | 0.215 | 214 | 2    | 7.93 | 28.5 | 0.823 |
| Subject 47 | 0.269 | 188 | 3.13 | 5.74 | 29   | 0.776 |
| Subject 48 | 0.253 | 210 | 2.21 | 9.24 | 29.6 | 0.739 |
| Subject 49 | 0.256 | 199 | 2.61 | 8.17 | 26.5 | 0.901 |
| Subject 50 | 0.273 | 183 | 2.16 | 23.2 | 28.3 | 0.673 |
| Subject 51 | 0.33  | 187 | 4.97 | 6.82 | 25.4 | 1.07  |
| Subject 52 | 0.279 | 195 | 2.74 | 4.8  | 26.9 | 0.629 |
| Subject 53 | 0.353 | 216 | 1.47 | 8.86 | 31   | 0.631 |

---
